# Supplementary material for: Mechanistic insights into structure-based design of a Lyme disease subunit vaccine
Source: PubMed Central journal article supplement — bioRxiv. 2024 Oct 28:2024.10.23.619738. Preprint. [Version 1] doi: 10.1101/2024.10.23.619738 (PMC11565809; doi:10.1101/2024.10.23.619738), 2024-10-28
Supplement: media-1.pdf [file media-1.pdf]

1 **SUPPLEMENTAL MATERIALS**

2 **SUPPLEMENTAL FIGURE LEGENDS**

3 **Figure S1. CD spectra demonstrate no impacts of secondary structures by mutating**  
4 **indicating amino acids of CspZ-YA.** Far-UV CD analysis of (A) untagged CspZ-YA and CspZ-  
5 YAC<sub>187S</sub> (CspZ-YAC<sub>187S</sub>), and (B) histidine tagged CspZ-YA (His-CspZ-YA) and the mutant  
6 proteins derived from this protein. The molar ellipticity,  $\Phi$ , was measured from 190-250nm for  
7 10 $\mu$ M of each protein in PBS.

8

9 **Figure S2. Immunization of CspZ-YA and its mutant proteins triggered indistinguishable**  
10 **levels of antibodies against CspZ.** Sera were collected at 14dpi from C3H/HeN mice immunized  
11 (A) once, (B) twice, or (C) three times in the fashion as described in Fig. 1. These mice were  
12 immunized with PBS (control) or untagged CspZ-YA or its derived mutant protein, or histidine  
13 tagged CspZ-YA (His-CspZ-YA), or its derived mutant proteins (Six mice for CspZ-YA- or CspZ-  
14 YAC<sub>187S</sub>-immunized mice whereas five mice for the rest of immunization groups of mice). The  
15 levels of total IgG against CspZ were determined using quantitative ELISA. Data shown are the  
16 geometric mean  $\pm$  geometric standard deviation of the titers of anti-CspZ antibodies from five mice  
17 per group. Asterisks indicate the statistical significances ( $p < 0.05$ , Kruskal Wallis test with the  
18 two-stage step-up method of Benjamini, Krieger, and Yekutieli) of differences in antibody titers  
19 relative to the sera from PBS-inoculated mice.

20

21 **Figure S3. Immunization once or three times with CspZ-YA, CspZ-YAC<sub>187S</sub>, or CspZ-YA<sub>I183Y</sub>**  
22 **showed indistinguishable protectivity for seroconversion and borrelial tissue colonization.**  
23 Five PBS- or lipidated OspA (OspA)-, or histidine tagged CspZ-YA (His-CspZ-YA)- or CspZ-

24 YA<sub>I183Y</sub> (I183Y)-, or six untagged CspZ-YA- or CspZ-YAC187S (C187S)-immunized C3H/HeN  
25 mice that were immunized (**A to F**) once or (**G to L**) three times by indicated proteins in the  
26 fashion as described in Fig. 1. At 21 days post last immunization, these mice were then fed on by  
27 nymphs carrying *B. burgdorferi* B31-A3. Mice inoculated with PBS that are not fed on by nymphs  
28 were included as an uninfected control group (uninfect.). (**A and G**) Seropositivity was determined  
29 by measuring the levels of IgG against C6 peptides in the sera of those mice at 42 days post last  
30 immunization using ELISA. The mouse was considered as seropositive if that mouse had IgG  
31 levels against C6 peptides greater than the threshold, the mean plus 1.5-fold standard deviation of  
32 the IgG levels against C6 peptides from the PBS-inoculated, uninfected mice (dotted line). The  
33 number of mice in each group with the anti-C6 IgG levels greater than the threshold (seropositive)  
34 is shown. Data shown are the geometric mean  $\pm$  geometric standard deviation of the titers of anti-  
35 C6 IgG. Statistical significances ( $p < 0.05$ , Kruskal-Wallis test with the two-stage step-up method  
36 of Benjamini, Krieger, and Yekutieli) of differences in IgG titers relative to (\*) uninfected mice  
37 are presented. (**B to F, H to L**) *B. burgdorferi* (*Bb*) burdens at (**B and H**) nymphs after when  
38 feeding to repletion or (**C and I**) the tick feeding site (“Bite Site”), (**D and J**) bladder, (**E and K**)  
39 heart, and (**F and L**) knees, were quantitatively measured at 42 days post last immunization, shown  
40 as the number of *Bb* per 100ng total DNA. Data shown are the geometric mean  $\pm$  geometric  
41 standard deviation of the spirochete burdens from each group of mice. Asterisks indicate the  
42 statistical significance ( $p < 0.05$ , Kruskal Wallis test with the two-stage step-up method of  
43 Benjamini, Krieger, and Yekutieli) of differences in bacterial burdens relative to uninfected mice.  
44  
45 **Figure S4. More than 90% of Lyme disease human patients develop CspZ antibodies.** Sera  
46 from 38 patients with seropositive for Lyme disease infection (Two tier pos.; Positive in Two tier

47 test) were determined for the titers of antibodies that recognize untagged CspZ using ELISA, as  
48 described in the section “ELISA” of the Materials and Methods. Ten serum samples from humans  
49 residing in non-endemic area of Lyme disease were included as negative control (Neg. ctrl.) and  
50 to set up the threshold value of titers that can be used to determine CspZ antibody positivity. That  
51 threshold value was mean 1.5-folds of standard deviation extrapolated from the values of negative  
52 control human sera. Thirty six out of 38 serum samples (94.7%) yield greater anti-CspZ IgG titers  
53 than the threshold values and was thus considered positive for CspZ antibodies. Shown is the  
54 geometric mean  $\pm$  geometric standard deviation of the titers. Statistical significance ( $p < 0.05$ ,  
55 Kruskal Wallis test with the two-stage step-up method of Benjamini, Krieger, and Yekutieli) of  
56 differences in CspZ-IgG titers between groups are indicated (“#”).

57

58

59 **Figure S5. The humanized monoclonal antibodies 1139c and 1193c efficiently recognize**  
60 **CspZ-YA, prevent human FH-binding, and promote lysis and opsonophagocytosis of *B.***  
61 ***burgdorferi*. (A and B)** The humanized monoclonal antibody (A) #1139c or (B) #1193c was  
62 flowed over the chip surface, conjugated with indicated untagged CspZ-YA. Binding was  
63 measured in response units (R.U.) by surface plasmon resonance. Shown is the mean  $\pm$  standard  
64 deviation of the  $k_{on}$ ,  $k_{off}$ , and  $K_D$  values extrapolated from three experiments. One represented  
65 experiment is shown in this panel. (C) The monoclonal antibody #1139c or #1193c, or irrelevant  
66 human IgG (control, irr. hIgG) at indicated concentrations or PBS (control, data not shown) was  
67 added into the CspZ-coated ELISA plate wells. Each of those wells was then incubated with human  
68 FH, and the levels of bound FH were quantified using sheep anti-human FH and goat anti-sheep  
69 HRP IgG as primary and secondary antibodies, respectively. The work was performed on three

70 independent experiments; within each experiment, samples were run in triplicate. Data are  
71 expressed as the percent human FH binding, derived by normalizing the levels of bound human  
72 FH from IgG-treated wells to that from PBS-treated wells. Data shown are the mean  $\pm$  SEM of the  
73 percent human FH binding from three replicates. Shown is one representative experiment. The  
74 concentrations of the IgG to inhibit 50% of human FH bound by CspZ (IC<sub>50</sub>) was obtained from  
75 curve-fitting and shown in the inset figure. The IC<sub>50</sub> values are shown as the mean  $\pm$  SD of from  
76 three experiments. **(D)** The monoclonal antibody #1139c or #1193c, or irrelevant human IgG  
77 (control, irr. hIgG) or PBS (control, data not shown) were serially diluted as indicated, and mixed  
78 with guinea pig complement and *B. burgdorferi* strains B31-A3 ( $5 \times 10^5$  cells ml<sup>-1</sup>). After  
79 incubated for 24 hours, surviving spirochetes were quantified from three fields of view for each  
80 sample using dark-field microscopy. The work was performed on three independent experiments.  
81 The survival percentage was derived from the proportion of IgG-treated to PBS-treated spirochetes.  
82 Shown is one representative experiment, and in that experiment, the data points are the mean  $\pm$   
83 SEM of the survival percentage from three replicates. The 50% borreliacidal activity of each IgGs  
84 (BA<sub>50</sub>), representing the IgG concentrations that effectively killed 50% of spirochetes, was  
85 obtained and extrapolated from curve-fitting and shown in the inset figure. The BA<sub>50</sub> values are  
86 shown as the mean  $\pm$  SD of from three experiments.

87

88 **Figure S6. The humanized monoclonal antibodies 1139c and 1193c prevent seroconversion**  
89 **and tissue colonization caused by *B. burgdorferi* B31-A3 infection. (A)** Timeframe of the IgG  
90 inoculation and *B. burgdorferi* infection. **(B to G)** Five C3H/HeN mice were inoculated with the  
91 monoclonal antibody #1139c or #1193c, or irrelevant human IgG (control, irr. hIgG) at the dose  
92 of 1 mg/kg. At 24 hours after IgG inoculation, these mice were fed on by *I. scapularis* nymphs

93 carrying *B. burgdorferi* B31-A3 (*Bb* B31-A3). An additional five mice inoculated with PBS but  
94 not fed on by ticks were included as the control (Uninfect.). The tissues were collected from those  
95 mice at 4 days post nymph feeding. Spirochete burdens at **(B)** the tick feeding site (“Bite Site”),  
96 **(C)** bladder, **(D)** heart, and **(E)** knees were quantitatively measured at 21 dpf, shown as the number  
97 of spirochetes per 100ng total DNA. Data shown are the geometric mean  $\pm$  geometric standard  
98 deviation of the spirochete burdens from five mice per group. Statistical significances ( $p < 0.05$ ,  
99 Kruskal-Wallis test with the two-stage step-up method of Benjamini, Krieger, and Yekutieli) of  
100 differences in bacterial burdens relative to (\*) uninfected mice are presented.

## 101 SUPPLEMENTAL TABLES

102 Table S1. Statistics for Data and Structure Quality.

| Dataset                                     | CspZ-YA                                       | CspZ-YA <sub>C187S</sub>                      | 103<br>104 |
|---------------------------------------------|-----------------------------------------------|-----------------------------------------------|------------|
| <b>Space group</b>                          | P2 <sub>1</sub> 2 <sub>1</sub> 2 <sub>1</sub> | P2 <sub>1</sub> 2 <sub>1</sub> 2 <sub>1</sub> | 105        |
| <b>Unit cell dimensions</b>                 |                                               |                                               | 106        |
| <b>a (Å)</b>                                | 31.47                                         | 31.55                                         | 107        |
| <b>b (Å)</b>                                | 41.55                                         | 41.68                                         | 108        |
| <b>c (Å)</b>                                | 162.56                                        | 162.81                                        | 109        |
| <b>Wavelength (Å)</b>                       | 0.9762                                        | 0.9184                                        | 110        |
| <b>Resolution (Å)</b>                       | 162.56-1.90                                   | 41.68-2.00                                    | 111        |
| <b>Highest resolution bin (Å)</b>           | 1.94-1.90                                     | 2.05-2.00                                     | 112        |
| <b>No. of reflections</b>                   | 231969                                        | 189839                                        | 113        |
| <b>No. of unique reflections</b>            | 17550                                         | 15299                                         | 114        |
| <b>Completeness (%)</b>                     | 99.5 (100.0)                                  | 99.9 (100.0)                                  | 115        |
| <b>R<sub>merge</sub></b>                    | 0.09 (0.46)                                   | 0.09 (0.38)                                   | 116        |
| <b>I/σ (I)</b>                              | 15.5 (4.8)                                    | 19.3 (6.2)                                    | 117        |
| <b>Multiplicity</b>                         | 13.2 (13.5)                                   | 12.4 (13.5)                                   | 118        |
| <b>Refinement</b>                           |                                               |                                               | 119        |
| <b>R<sub>work</sub></b>                     | 0.190 (0.245)                                 | 0.248 (0.204)                                 | 120        |
| <b>R<sub>free</sub></b>                     | 0.241 (0.308)                                 | 0.335 (0.337)                                 | 121        |
| <b>Average B-factor (Å<sup>2</sup>)</b>     |                                               |                                               | 122        |
| <b>Overall</b>                              | 28.4                                          | 29.8                                          | 123        |
| <b>From Wilson plot</b>                     | 17.0                                          | 17.5                                          | 124        |
| <b>No. of atoms</b>                         |                                               |                                               | 125        |
| <b>Protein</b>                              | 1743                                          | 1743                                          | 126        |
| <b>Water</b>                                | 199                                           | 170                                           | 127        |
| <b>RMS deviations from ideal</b>            |                                               |                                               | 128        |
| <b>Bond lengths (Å)</b>                     | 0.009                                         | 0.008                                         | 129        |
| <b>Bond angles (°)</b>                      | 1.530                                         | 1.457                                         | 130        |
| <b>Ramachandran outliers (%)</b>            |                                               |                                               | 131        |
| <b>Residues in most favored regions (%)</b> | 94.42                                         | 94.88                                         | 132        |
| <b>Residues in allowed regions (%)</b>      | 4.65                                          | 4.19                                          | 133        |
| <b>Outliers (%)</b>                         | 0.93                                          | 0.93                                          | 134        |

151 Values in parentheses are for the highest resolution bin.

152

153 **Table S2. BA<sub>50</sub> values of the sera derived from mice immunized with CspZ-YA proteins in different immunization**  
 154 **frequency**

| BA <sub>50</sub> <sup>a</sup>         | CspZ-YA <sup>b</sup> |        |        |         |         | His-CspZ-YA <sup>c</sup> |         |         |         |          |         |
|---------------------------------------|----------------------|--------|--------|---------|---------|--------------------------|---------|---------|---------|----------|---------|
|                                       | -                    | C187S  | -      | T67P    | I80T    | F105P                    | I115T   | K136E   | V142M   | I183Y    | G193M   |
| Immunization frequency 1 <sup>d</sup> | 25±1.6               | 19±1.2 | 26±1.1 | 20±1.5  | 24±1.6  | 29±1.0                   | 25±1.2  | 17±1.2  | 21±1.3  | 29±1.3   | 27±1.1  |
| 2 <sup>d</sup>                        | 43±1.3               | 204±1  | 43±1.5 | 45±1.1  | 56±1.1  | 53±1.0                   | 53±1.3  | 41±1.1  | 35±1.3  | 164±1.0  | 48±1.0  |
| 3 <sup>d</sup>                        | 232±1.3              | 832±1  | 259±1  | 241±1.2 | 202±1.3 | 268±1.6                  | 287±1.3 | 223±1.4 | 239±1.4 | 1306±1.4 | 238±1.5 |

155 <sup>a</sup>The dilution rate of the sera that kill 50% of *B. burgdorferi* B31-A3. Shown is the mean ± standard deviation of the BA<sub>50</sub> values  
 156 derived from three experiments (three replicates per experiment).

157 <sup>b</sup>Sera from the mice immunized with Untagged CspZ-YA

158 <sup>c</sup>Sera from the mice immunized with histidine tagged CspZ-YA

159 <sup>d</sup>1, 2, and 3 indicate the mice immunized with indicated antigen once, twice, and three times, respectively, as described in Fig.  
 160 1.

161

162

163

164 **Table S3. The thermostability of CspZ-YA proteins.**

|                                       | <b>CspZ-YA</b> |              | <b>His-CspZ-YA</b> |              |
|---------------------------------------|----------------|--------------|--------------------|--------------|
|                                       | -              | <b>C187S</b> | -                  | <b>I183Y</b> |
| <b>T<sub>m</sub> (°C)<sup>a</sup></b> | 58.46±0.26     | 62.72±0.17   | 57.58±1.13         | 61.87±0.09   |

165 <sup>a</sup>Shown is the mean ± standard deviation of the T<sub>m</sub> values derived from six experiments (one  
 166 replicate per experiment).

167 <sup>b</sup>Histidine-tagged CspZ-YA

168

169

170

171

172

173

174

175

176

177

178

179

180

181

182

183

184



185 **Table S4. Strains and plasmids used in this study.**

| Strain or plasmid                         | Genotype or characteristic                                                                                            | Source     |
|-------------------------------------------|-----------------------------------------------------------------------------------------------------------------------|------------|
| <i>B. burgdorferi</i>                     |                                                                                                                       |            |
| B31-A3                                    | Clone A3 of <i>B. burgdorferi</i> B31 isolated from <i>I. scapularis</i> ticks in US.                                 | [80]       |
| <i>E. coli</i>                            |                                                                                                                       |            |
| BL21(DE3)                                 | F <sup>-</sup> , <i>ompT hsdSB</i> (rB <sup>-</sup> mB <sup>-</sup> ) <i>gal dcm</i> (DE3)                            | Novagene   |
| BL21(DE3)/pET28a-CspZ                     | BL21(DE3) producing residues 19 to 237 of CspZ from <i>B. burgdorferi</i> B31-A3                                      | [30]       |
| BL21(DE3)/pET28a-CspZ-YA                  | BL21(DE3) producing residues 19 to 237 of CspZ with tyrosine-207 and -211 simultaneously replaced by alanine residues | [30]       |
| BL21(DE3)/pET41a-CspZ-YA                  | BL21(DE3) producing residues 19 to 237 of CspZ with tyrosine-207 and -211 simultaneously replaced by alanine residues | [61]       |
| BL21(DE3)/pET41a-CspZ-YA <sub>C53S</sub>  | BL21(DE3) producing residues 19 to 237 of CspZ-YA with cysteine-53 replaced by serine                                 | This study |
| BL21(DE3)/pET28a-CspZ-YA <sub>T67P</sub>  | BL21(DE3) producing residues 19 to 237 of CspZ-YA with threonine-67 replaced by proline                               | This study |
| BL21(DE3)/pET28a-CspZ-YA <sub>I80T</sub>  | BL21(DE3) producing residues 19 to 237 of CspZ-YA with isoleucine-80 replaced by threonine                            | This study |
| BL21(DE3)/pET28a-CspZ-YA <sub>F105P</sub> | BL21(DE3) producing residues 19 to 237 of CspZ-YA with phenylalanine-105 replaced by proline                          | This study |
| BL21(DE3)/pET28a-CspZ-YA <sub>I115T</sub> | BL21(DE3) producing residues 19 to 237 of CspZ-YA with isoleucine-115 replaced by threonine                           | This study |
| BL21(DE3)/pET28a-CspZ-YA <sub>K136E</sub> | BL21(DE3) producing residues 19 to 237 of CspZ-YA with lysine-136 replaced by glutamate                               | This study |
| BL21(DE3)/pET28a-CspZ-YA <sub>V142M</sub> | BL21(DE3) producing residues 19 to 237 of CspZ-YA with valine-142 replaced by methionine                              | This study |
| BL21(DE3)/pET28a-CspZ-YA <sub>I183Y</sub> | BL21(DE3) producing residues 19 to 237 of CspZ-YA with isoleucine-183 replaced by tyrosine                            | This study |

|                                           |                                                                                           |            |
|-------------------------------------------|-------------------------------------------------------------------------------------------|------------|
| BL21(DE3)/pET41a-CspZ-YA <sub>C187S</sub> | BL21(DE3) producing residues 19 to 237 of CspZ-YA with cysteine-187 replaced by tyrosine  | This study |
| BL21(DE3)/pET28a-CspZ-YA <sub>G139M</sub> | BL21(DE3) producing residues 19 to 237 of CspZ-YA with glycine-139 replaced by methionine | This study |

Plasmids

|                                 |                                                                                                                                |            |
|---------------------------------|--------------------------------------------------------------------------------------------------------------------------------|------------|
| pET28a-CspZ                     | KanR <sup>a</sup> ; pET28a encoding protein residue 19 to 237 of CspZ from <i>B. burgdorferi</i> B31-A3                        | [30]       |
| pET28a-CspZ-YA                  | KanR; pET28a encoding protein residue 19 to 237 of CspZ with tyrosine-207 and -211 simultaneously replaced by alanine residues | [30]       |
| pET41a-CspZ-YA                  | KanR; pET41a encoding protein residue 19 to 237 of CspZ with tyrosine-207 and -211 simultaneously replaced by alanine residues | [61]       |
| pET41a-CspZ-YA <sub>C53S</sub>  | KanR; pET41a encoding protein residue 19 to 237 of CspZ-YA with cysteine-53 replaced by serine                                 | This study |
| pET28a-CspZ-YA <sub>T67P</sub>  | KanR; pET28a encoding protein residue 19 to 237 of CspZ-YA with threonine-67 replaced by proline                               | This study |
| pET28a-CspZ-YA <sub>I80T</sub>  | KanR; pET28a encoding protein residue 19 to 237 of CspZ-YA with isoleucine-80 replaced by threonine                            | This study |
| pET28a-CspZ-YA <sub>F105P</sub> | KanR; pET28a encoding protein residue 19 to 237 of CspZ-YA with phenylalanine-105 replaced by proline                          | This study |
| pET28a-CspZ-YA <sub>I115T</sub> | KanR; pET28a encoding protein residue 19 to 237 of CspZ-YA with isoleucine-115 replaced by threonine                           | This study |
| pET28a-CspZ-YA <sub>K136E</sub> | KanR; pET28a encoding protein residue 19 to 237 of CspZ-YA with lysine-136 replaced by glutamate                               | This study |
| pET28a-CspZ-YA <sub>V142M</sub> | KanR; pET28a encoding protein residue 19 to 237 of CspZ-YA with valine-142 replaced by methionine                              | This study |
| pET28a-CspZ-YA <sub>I183Y</sub> | KanR; pET28a encoding protein residue 19 to 237 of CspZ-YA with isoleucine-183 replaced by tyrosine                            | This study |
| pET41a-CspZ-YA <sub>C187S</sub> | KanR; pET41a encoding protein residue 19 to 237 of CspZ-YA with cysteine-187 replaced by serine                                | This study |

pET28a-CspZ-YA<sub>G139M</sub>

KanR; pET28a encoding protein residue 19  
to 237 of CspZ-YA with glycine-139  
replaced by methionine

This study

---

186 <sup>a</sup> Kanamycin resistant

187
